# Supplementary material for: Selective hydrodeoxygenation of lignin oil to valuable phenolics over Au/Nb2O5 in water
Source: Royal Society of Chemistry journal article supplement (doi:10.1039/c9gc00327d), 2019-01-01
Supplement: c9gc00327d1.pdf [file c9gc00327d1.pdf]

## Supplementary Information

### Selective hydrodeoxygenation of lignin oil to valuable phenolics over Au/Nb<sub>2</sub>O<sub>5</sub> in water

Lin Dong <sup>a</sup>, Yu Xin <sup>a</sup>, Xiaohui Liu <sup>a\*</sup>, Yong Guo <sup>a</sup> and Yanqin Wang <sup>a\*</sup>, Chih-Wen Pao<sup>b</sup>,  
Jeng-Lung Chen<sup>b</sup>

<sup>a</sup>Shanghai Key Laboratory of Functional Materials Chemistry, Research Institute of Industrial Catalysis, School of Chemistry and Molecular Engineering, East China University of Science and Technology, Shanghai, 200237, (P.R. China)

<sup>b</sup>National Synchrotron Radiation Research Center, Hsinchu, 30076, Taiwan

E-mail: [xhliu@ecust.edu.cn](mailto:xhliu@ecust.edu.cn); [wangyanqin@ecust.edu.cn](mailto:wangyanqin@ecust.edu.cn)

#### Table of contents

|                                    |   |
|------------------------------------|---|
| I . Figures.....                   | 2 |
| II . Tables.....                   | 4 |
| III . Experimental procedures..... | 6 |

## I. Figures

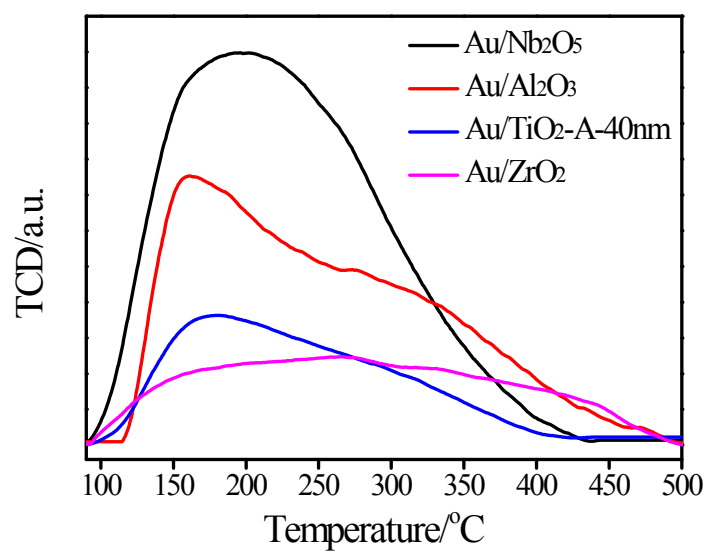

**Fig. S1** NH<sub>3</sub>-TPD profiles of Au/Nb<sub>2</sub>O<sub>5</sub>, Au/Al<sub>2</sub>O<sub>3</sub>, Au/TiO<sub>2</sub>-A-40nm and Au/ZrO<sub>2</sub>.

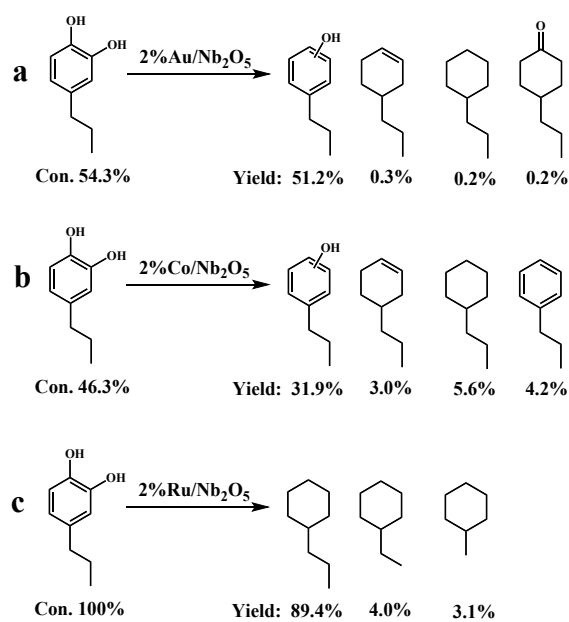

**Fig. S2** Reaction results for the hydrodeoxygenation of 4-propylcatechol over different Au-based catalysts in a batch reactor. Reaction condition: 4-propylcatechol (0.5 g), catalyst (0.2 g), deionized water (10 mL), 300 °C, 2 h and initial H<sub>2</sub> pressure of 6.5 MPa.

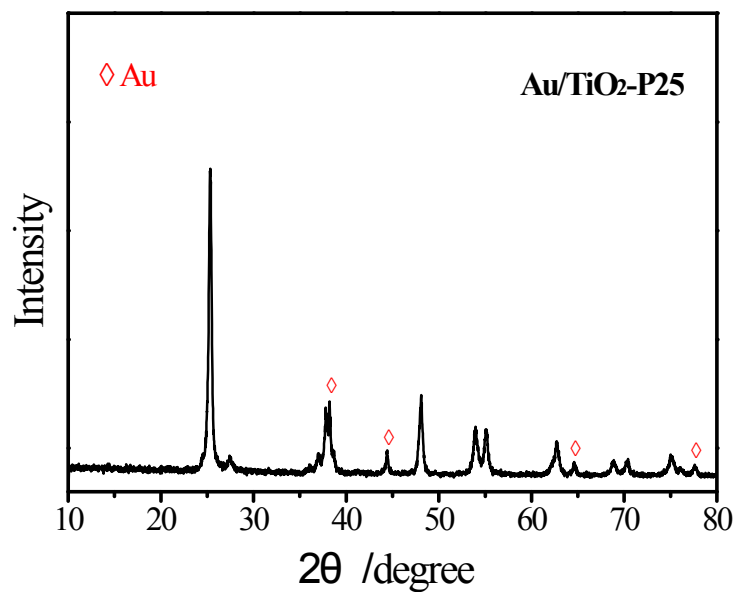

Fig. S3. XRD patterns of Au/TiO<sub>2</sub>-P25.

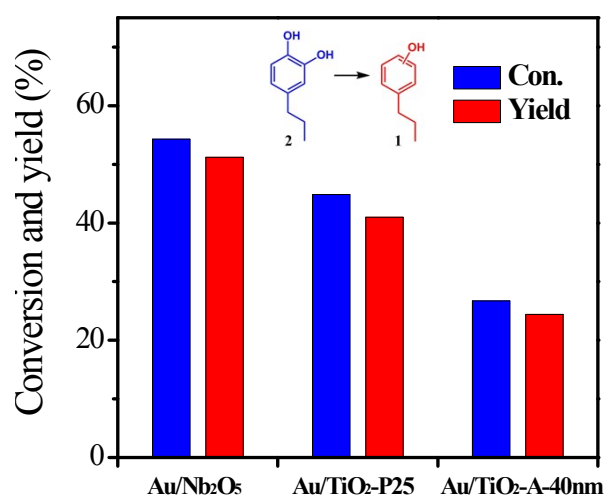

Fig. S4 Reaction results for the hydrodeoxygenation of 4-propylcatechol over different Au-based catalysts in a batch reactor. Reaction condition: 2-methoxy-4-propylphenol (0.5 g), catalyst (0.2 g), deionized water (10 mL), 300 °C, 2h and initial H<sub>2</sub> pressure of 6.5MPa.

## II. Tables

**Table S1.** The component of various lignin oils.

| Entry | Lignin oil | Component (wt %)                                                                  |                                                                                   |                                                                                   |                                                                                    |                                                                                     |                                                                                     | Total<br>(wt %) |
|-------|------------|-----------------------------------------------------------------------------------|-----------------------------------------------------------------------------------|-----------------------------------------------------------------------------------|------------------------------------------------------------------------------------|-------------------------------------------------------------------------------------|-------------------------------------------------------------------------------------|-----------------|
|       |            | 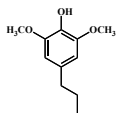 |  |  |  |  |  |                 |
| 1     | beech      | 54.5                                                                              | 0.7                                                                               | 0.5                                                                               | 18.3                                                                               | 0.4                                                                                 | 0.4                                                                                 | 74.8            |
| 2     | birch      | 45.6                                                                              | 2.0                                                                               | 0.7                                                                               | 17.6                                                                               | 1.2                                                                                 | 0.4                                                                                 | 67.4            |
| 3     | pine       | 35.4                                                                              | 1.6                                                                               | 0.5                                                                               | 35.6                                                                               | 1.2                                                                                 | 0.6                                                                                 | 74.9            |
| 4     | cornstalk  | 23.1                                                                              | 3.7                                                                               | 0.7                                                                               | 21.9                                                                               | 1.7                                                                                 | 0.8                                                                                 | 52.0            |

The other components of lignin oil are polyhydric alcohols.

**Table S2.** Summary of physicochemical properties and ICP analysis results of Au/TiO<sub>2</sub>-P25.

| Catalyst                 | Surface area<br>(m <sup>2</sup> g <sup>-1</sup> ) | Pore volume<br>(cm <sup>3</sup> g <sup>-1</sup> ) | Pore size<br>(nm) | Au loading <sup>a</sup><br>(wt%) |
|--------------------------|---------------------------------------------------|---------------------------------------------------|-------------------|----------------------------------|
| Au/TiO <sub>2</sub> -P25 | 21                                                | 0.207                                             | 17.4              | 2.0                              |

<sup>a</sup> Determined by ICP-AES.

**Table S3.** Results of full conversion of various types of lignocellulose

| Lignocellulose                    |    | beech | birch | pine | cornstalk |
|-----------------------------------|----|-------|-------|------|-----------|
| Lignin oil (mg) <sup>a</sup>      |    | 98    | 152   | 100  | 84        |
| Monomer yield (%) <sup>b</sup>    |    | 76    | 67    | 75   | 52        |
| Monomer distribution <sup>c</sup> | 1S | 25    | 26    | 48   | 50        |
|                                   | 2S | 0     | 2     | 2    | 3         |
|                                   | 3S | 0     | 1     | 0    | 2         |

|    |    |    |    |    |
|----|----|----|----|----|
| 1G | 73 | 68 | 47 | 37 |
| 2G | 1  | 3  | 2  | 7  |
| 3G | 1  | 1  | 1  | 1  |

---

Reaction conditions: lignocellulose (1.0 g), 5%Ru/C (0.1 g), methanol (20 mL), 250°C, 3h, and initial H<sub>2</sub> pressure of 3MPa.

<sup>a</sup>Calculated based on weighed of electronic scales.

<sup>b</sup>Monomeryield=weightmonomers/weightlignin oil×100%

<sup>c</sup>“1S”, “2S”, “3S”, “1G”, “2G” and “3G” sign 2-methoxy-4-propylphenol, 4-(3-hydroxypropyl)-2-methoxyphenol, 2-methoxy-4-(3-methoxypropyl)phenol, 2,6-dimethoxy-4-propylphenol, 4-(3-hydroxypropyl)-2,6-dimethoxyphenol and 2,6-dimethoxy-4-(3-methoxypropyl)phenol, respectively.

### **III. Experimental procedures.**

#### **The preparation process of lignin oil**

Lignin oil was derived from raw lignocellulosic biomass by reductive depolymerization. In a typical experiment, 1.0 g of raw lignocellulosic biomass sawdust (beech, birch, pine or cornstalk), 0.1 g Ru/C and 20 mL methanol were loaded into a 50 mL Teflon-lined stainless-steel autoclave. The reactor was sealed, purged with H<sub>2</sub> three times and pressurized with 3 MPa at room temperature. The mixture was stirred at 800 rpm and the temperature was increased to 250 °C for 3h. After reaction, the autoclave was cooled in ice-water bath immediately. The lignin oil was obtained from reaction mixture by vacuum distillation to remove solvent.
